# Supplementary material for: Photodynamic Therapy for Oral Squamous Cell Carcinoma: A Systematic Review and Meta-Analysis
Source: Hindawi journal article supplement (doi:10.1155/2021/6641358), 2021-02-15
Supplement: f2 [file 6641358.f2.zip]

Archive with 3 entries (3 files):
- Supplementary Figure 2A (1).pdf
- Supplementary Figure 2B (1).pdf
- Supplementary Figure2C (1).pdf
