# Supplementary material for: Photodynamic Therapy for Oral Squamous Cell Carcinoma: A Systematic Review and Meta-Analysis
Source: Hindawi journal article supplement (doi:10.1155/2021/6641358), 2021-02-15

**Studies**

Estimate (95% C.I.)

**Overall**

0.799 (0.708, 0.867)

– Ikeda H 0.802 (0.708, 0.871)

– Toratani S 0.792 (0.695, 0.864) ←

– Rigual N 0.800 (0.704, 0.870)

– Karakullukcu B 0.790 (0.693, 0.863) ←

– Ikeda H 0.790 (0.695, 0.861) ←

– deVisscher S A 0.802 (0.698, 0.876) ←

– Karakullukcu B 0.811 (0.711, 0.882)

– Jerjes W 0.818 (0.746, 0.874)

– Merrill A. Biel 0.779 (0.688, 0.850) ←

– Vanessa Gayl 0.796 (0.699, 0.868) ←

– KAI Johannes 0.810 (0.720, 0.877)

– Rigual N R 0.794 (0.699, 0.864) ←

– Hopper C 0.796 (0.696, 0.869) ←

– Copper M P 0.796 (0.699, 0.868) ←

– Kubler A C 0.787 (0.693, 0.859) ←

– Kathleen F M 0.812 (0.721, 0.879)

– Yoshida T 0.812 (0.725, 0.877)

– Grant W E 0.792 (0.697, 0.863) ←

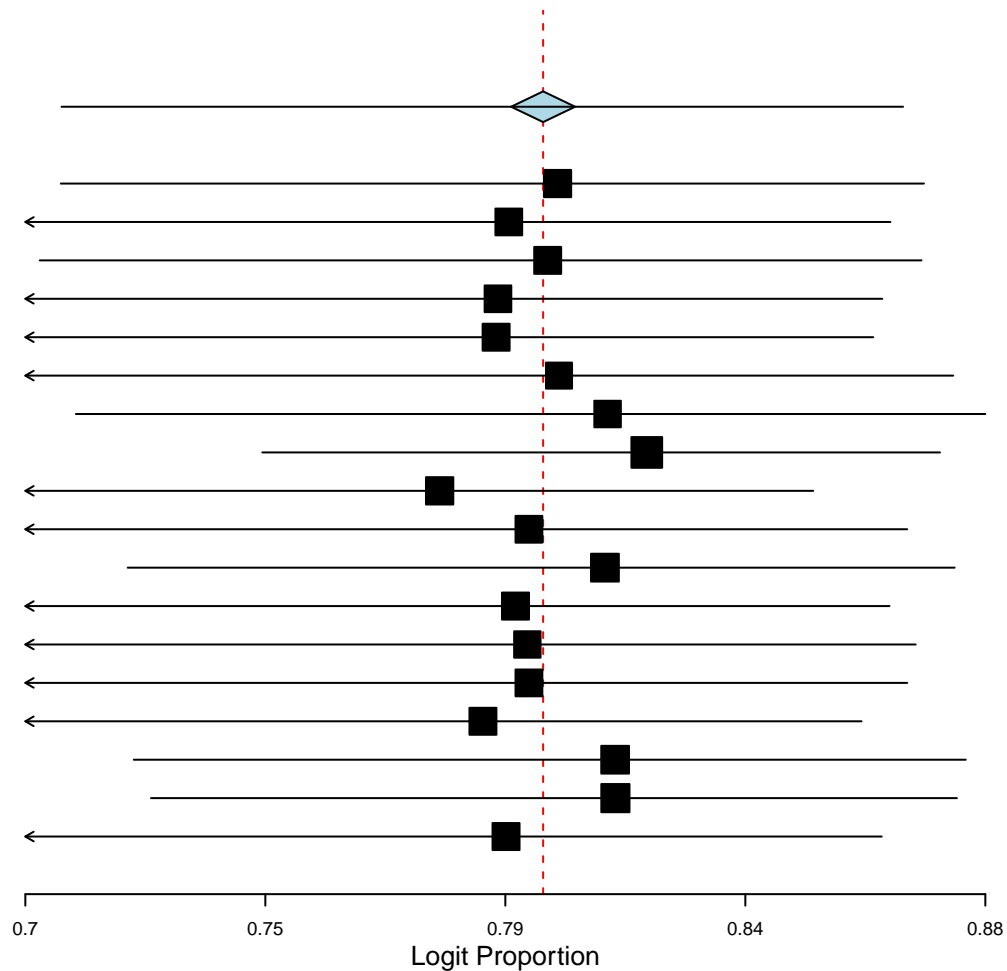

Supplement: f2 [file 6641358.f2.zip]
