# Supplementary material for: Photodynamic Therapy for Oral Squamous Cell Carcinoma: A Systematic Review and Meta-Analysis
Source: Hindawi journal article supplement (doi:10.1155/2021/6641358), 2021-02-15

## Studies

Estimate (95% C.I.)

## Overall

0.967 (0.902, 0.989)

– Toratani S 0.968 (0.886, 0.992) ←

– Karakullukcu B 0.978 (0.923, 0.994)

– Merrill A. Biel 0.949 (0.875, 0.980) ←

– Vanessa Gayl 0.965 (0.887, 0.990) ←

– Rigual N R 0.969 (0.895, 0.991)

– Hopper C 0.955 (0.877, 0.984) ←

– Yoshida T 0.977 (0.916, 0.994)

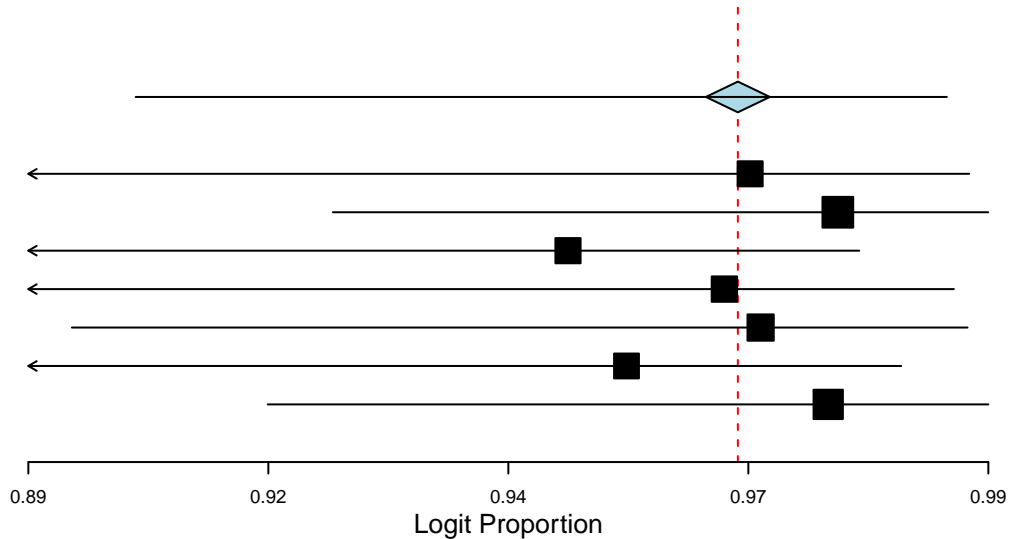

Supplement: f2 [file 6641358.f2.zip › Supplementary Figure 2B (1).pdf]
