# Supplementary figures and images for: Photodynamic Therapy for Oral Squamous Cell Carcinoma: A Systematic Review and Meta-Analysis
Source: Hindawi journal article supplement (doi:10.1155/2021/6641358), 2021-02-15

## Studies

Estimate (95% C.I.)

## Overall

0.158 (0.090, 0.264)

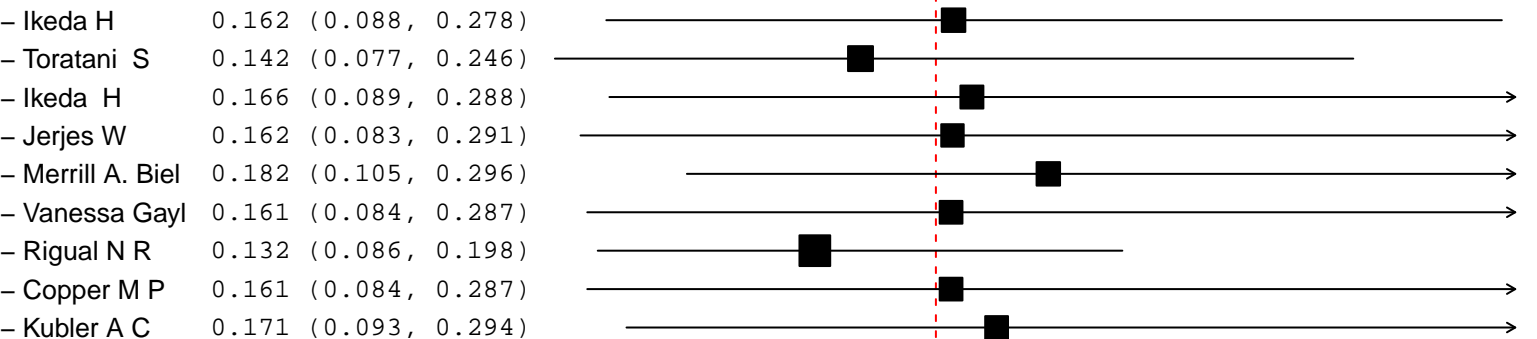

0.08

0.13

0.18

0.23

0.28

Logit Proportion

Supplement: f2 [file 6641358.f2.zip › Supplementary Figure2C (1).pdf]
